# Supplementary material for: A combination of positive dielectrophoresis driven on-line enrichment and aptamer-fluorescent silica nanoparticle label for rapid and sensitive detection of Staphylococcus aureus
Source: Royal Society of Chemistry journal article supplement (doi:10.1039/c5an00535c), 2015-01-01
Supplement: c5an00535c1.pdf [file c5an00535c1.pdf]

1                   **Electronic Supplementary Information (ESI)**  
2                   **A combination of positive dielectrophoresis driven on-line**  
3                   **enrichment and aptamer-fluorescent silica nanoparticles label for**  
4                   **rapid and sensitive detection of *Staphylococcus aureus***

5 *Jingfang Shangguan, Yuhong Li, Dinggen He, Xiaoxiao He,\* Kemin Wang,\* Zhen*  
6 *Zou, Hui Shi*

7 State Key Laboratory of Chemo/Biosensing and Chemometrics, College of Biology,  
8 College of Chemistry and Chemical Engineering, Hunan University, Key Laboratory  
9 for Bio-Nanotechnology and Molecule Engineering of Hunan Province, Changsha  
10 410082, China.

11 \*To whom correspondence should be addressed. Tel: 86-731-88821566; Fax: 86-731-  
12 88821566;       E-mail:       kmwang@hnu.edu.cn.       xiaoxiaohe@hnu.edu.cn

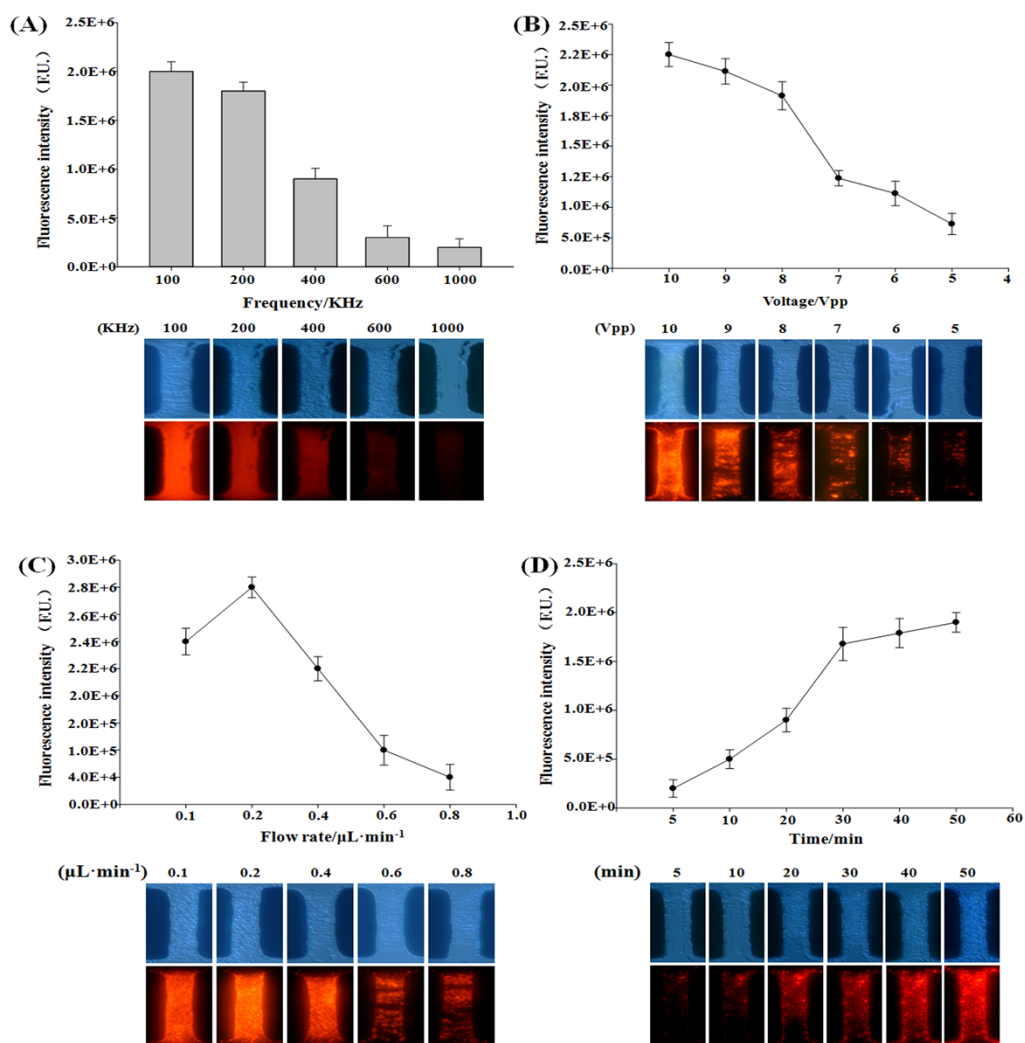

**Fig. S1** Investigation of the influence factors for pDEP enrichment. (A). frequency (B). voltage (C). flow rate and (D). enriching time. 900μL dilutions of *S. aureus* suspended in DI water with concentration of  $1 \times 10^5$  cfu mL<sup>-1</sup> were incubated with Apt<sub>*S.aureus*</sub>/FNPs (100μL, 5 mg mL<sup>-1</sup>) for 40 min at 37°C before introduced into the microchannel.

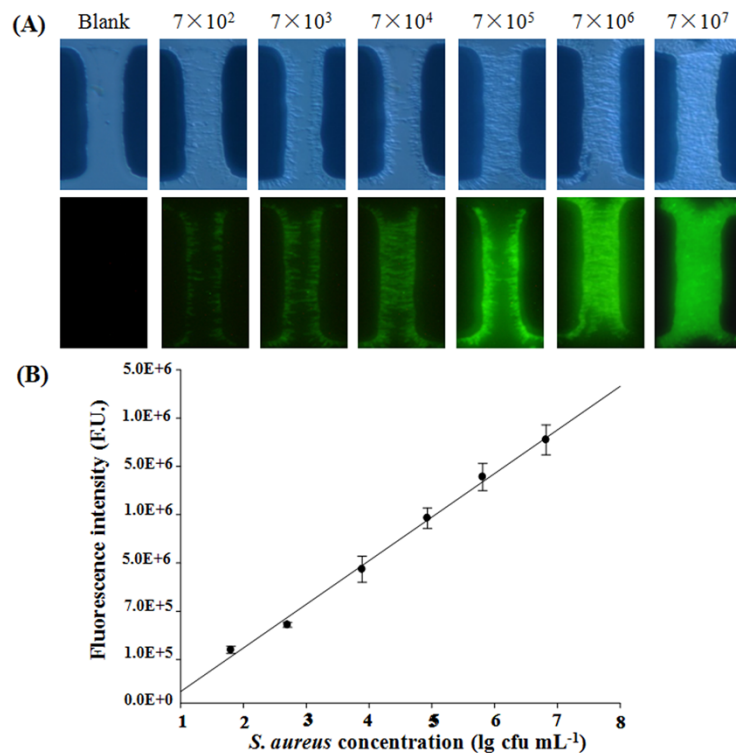

**Fig. S2** Detection of *S. aureus* with pDEP enrichment and FITC-aptamer label. (A). The DIC and corresponding fluorescence image of different concentrations of FITC-aptamer incubated *S. aureus* at detection area captured by pDEP. The applied AC field was optimal conditions (100 KHz, 10 Vpp, 0.2  $\mu\text{L min}^{-1}$ , 30 min). (B). The calibration curve of fluorescence intensity vs. *S. aureus* at different concentrations, the detection limit was 580 cfu mL<sup>-1</sup>.

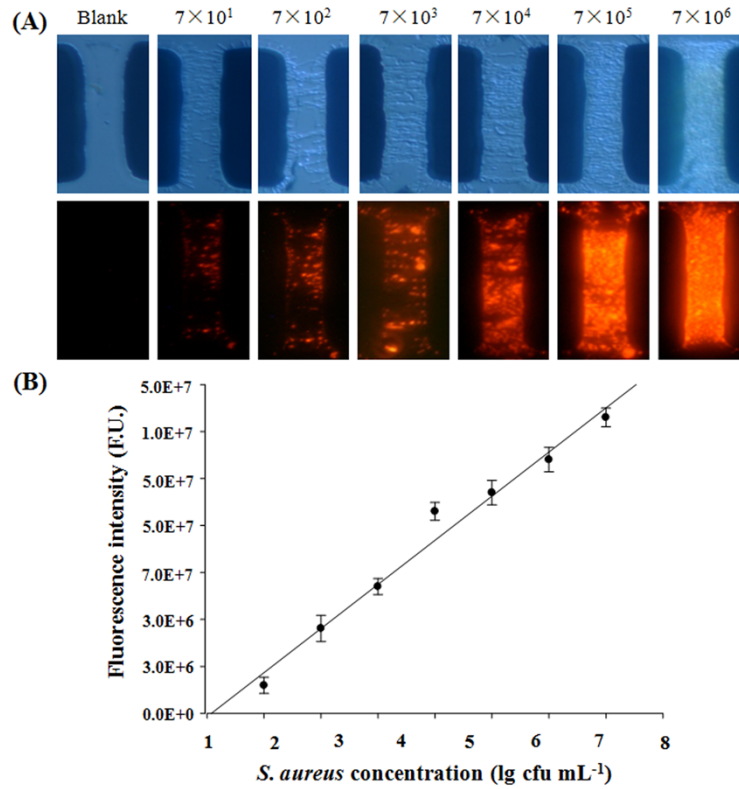

**Fig. S3** The DIC and corresponding fluorescence image of detected *S. aureus* in spiked water by pDEP with different artificial concentrations. (A). The DIC and corresponding fluorescence image of different concentrations of Apt<sub>*S.aureus*</sub>/FNPs labelled *S. aureus* at detection area captured by pDEP. (B). The calibration curve of fluorescence intensity vs. *S. aureus* at different concentrations, the detection limit was 270 cfu mL<sup>-1</sup> The applied AC field was optimal conditions (100 KHz, 10 Vpp, 0.2 uL min<sup>-1</sup>, 30 min)

**Table. S1** Detection efficiencies of *S. aureus* in spiked water samples using pDEP enrichment and aptamer/FNPs bioconjugates label.

| IC(cfu mL <sup>-1</sup> ) | MC(cfu mL <sup>-1</sup> )               | MC/IC(%)                            |
|---------------------------|-----------------------------------------|-------------------------------------|
| $7 \times 10^2$           | $4.86 \times 10^2 \pm 1.92 \times 10^2$ | 69.4%                               |
| $7 \times 10^3$           | $5.60 \times 10^3 \pm 2.35 \times 10^3$ | 80%                                 |
| $7 \times 10^4$           | $6.27 \times 10^4 \pm 1.29 \times 10^4$ | 89.6%                               |
| $7 \times 10^5$           | $6.80 \times 10^5 \pm 2.61 \times 10^5$ | 97.1%                               |
| $7 \times 10^6$           | $6.44 \times 10^6 \pm 2.65 \times 10^6$ | 92%<br>av $\pm$ RSD: 85.62 $\pm$ 10 |

[a] Initial concentration (IC) of *S. aureus* in mineral water samples. Measured concentration (MC) of *S. aureus* by this method.
